# Supplementary material
Source: Elsevier journal article supplement (https://www.sciencedirect.com/science/article/pii/S0300289620301903)
Supplement: mmc1 [file S0300289620301903:mmc1.pdf]

## APENDIX

**Tabla A.1** Estudios clínicos. Diferentes estrategias para el seguimiento de los pacientes

| Primer autor,<br>ref, (año)                            | Sujetos<br>Duración               | Resultados                                                                                                                                                                                                  |
|--------------------------------------------------------|-----------------------------------|-------------------------------------------------------------------------------------------------------------------------------------------------------------------------------------------------------------|
| <b>INTERVENCIONES SINCRONAS</b>                        |                                   |                                                                                                                                                                                                             |
| <b>Llamadas telefónicas</b>                            |                                   |                                                                                                                                                                                                             |
| <b>Chervin,16<br/>(1997)</b>                           | 33<br>1 mes                       | Las llamadas mejoraron el uso de CPAP durante el 1er mes de CPAP.                                                                                                                                           |
| <b>Leseux,17<br/>(2012)</b>                            | 101<br>6 meses                    | Mayor adherencia a la CPAP en el grupo de entrenamiento telefónico.                                                                                                                                         |
| <b>Sedkaoui, 18<br/>(2015)</b>                         | 379<br>3 meses                    | Los pacientes de SAHS que se benefician del entrenamiento telefónico son más cumplidores.                                                                                                                   |
| <b>Video visitas</b>                                   |                                   |                                                                                                                                                                                                             |
| <b>Parikh,19<br/>(2011)</b>                            | 90<br>2 sem                       | Los pacientes se mostraron igualmente satisfechos y adheridos a la CPAP, al ser visitados por el especialista de sueño en persona o por videoconferencia.                                                   |
| <b>Isetta,20<br/>(2014)</b>                            | 1) 50<br>2) 40<br>1 visita<br>c/u | 1) Los pacientes quedaron satisfechos con la visita de teleconsulta médica.<br>2) La capacitación de CPAP a través de videoconferencia demostró ser tan efectiva como la capacitación presencial.           |
| <b>INTERVENCIONES ASINCRÓNAS</b>                       |                                   |                                                                                                                                                                                                             |
| <b>Monitorización remota de CPAP</b>                   |                                   |                                                                                                                                                                                                             |
| <b>Stepnowsky,21<br/>(2007)</b>                        | 45<br>2 meses                     | La vigilancia del cumplimiento de CPAP y los datos de eficacia y el uso de estos datos por parte del equipo clínico es tan eficaz como la atención habitual para mejorar las tasas de cumplimiento de CPAP. |
| <b>Fox,22<br/>(2012)</b>                               | 75<br>3 meses                     | La monitorización de CPAP casi duplicó el uso de CPAP con relación al manejo habitual.                                                                                                                      |
| <b>Sistemas Automatizados de Cuidado y Autogestión</b> |                                   |                                                                                                                                                                                                             |

|                                                            |                    |                                                                                                                                                                                                                                           |
|------------------------------------------------------------|--------------------|-------------------------------------------------------------------------------------------------------------------------------------------------------------------------------------------------------------------------------------------|
| <b>DeMolles,23<br/>(2004)</b>                              | 30<br>2 meses      | El sistema de Respuesta con Voz Interactiva mostro mejor adherencia a la CPAP y control de los síntomas en el grupo de intervención.                                                                                                      |
| <b>Sparrow,24<br/>(2010)</b>                               | 250<br>12<br>meses | El sistema de Respuesta con Voz Interactiva mejoro de la adherencia a la CPAP y el estado funcional; con menos síntomas depresivos.                                                                                                       |
| <b>Munafo,25<br/>(2016)</b>                                | 122<br>1 mes       | La retroalimentación automatizada de CPAP (U-Sleep) vía texto/email reduce las labores de entrenamiento, manteniendo similar adherencia/efectividad de la CPAP.                                                                           |
| <b>Plataforma-Web</b>                                      |                    |                                                                                                                                                                                                                                           |
| <b>Stepnowsky,21<br/>(2013)</b>                            | 241<br>2 meses     | Los pacientes con acceso a la página web "MyCPAP" mejoran significativamente el uso de CPAP.                                                                                                                                              |
| <b>Kuna, (2015),<br/>26</b>                                | 138<br>3 meses     | La adherencia a la CPAP mejoró significativamente al dar a los pacientes acceso web a la información sobre su uso.                                                                                                                        |
| <b>Aplicación movil</b>                                    |                    |                                                                                                                                                                                                                                           |
| <b>Hardy,27<br/>(2014)</b>                                 | 15.000<br>3 meses  | Los pacientes con acceso al sitio web y app móvil mostraron una mejor adherencia en comparación con la atención estándar.                                                                                                                 |
| <b>Isetta, 28<br/>(2017)</b>                               | 30<br>6 sem        | Los pacientes con acceso a la app mostraron un cumplimiento adecuado de CPAP a las 6 semanas.                                                                                                                                             |
| <b>ESTRATEGIAS COMBINADAS (SINCRÓNICAS Y ASINCRÓNICAS)</b> |                    |                                                                                                                                                                                                                                           |
| <b>Coma-del-Corral, 29<br/>(2012)</b>                      | 40                 | El uso de poligrafía respiratoria y titulación auto-CPAP transmitidas telemáticamente a la Unidad del Sueño con video visitas como método de apoyo. Demostraron ser factibles y confiables para el manejo telemático a distancia (80 km). |
| <b>Isetta, 10<br/>(2015)</b>                               | 139<br>3 meses     | El seguimiento mediante una plataforma-web y video-visitas fue tan efectivo como el estándar en términos de cumplimiento de CPAP, mejoría de los síntomas, efectos secundarios y tasas de satisfacción.                                   |
| <b>Anttalainen,30<br/>(2016)</b>                           | 111<br>12<br>meses | La telemonitorización de la CPAP, incluyendo llamadas telefónicas adicionales y visitas genero un ahorro en el tiempo dedicado por enfermería, sin comprometer la efectividad del tratamiento.                                            |

|                         |                |                                                                                                                                                       |
|-------------------------|----------------|-------------------------------------------------------------------------------------------------------------------------------------------------------|
| <b>Hwang, 31 (2018)</b> | 556<br>3 meses | La retroalimentación automatizada de CPAP (U-Sleep) vía texto o email mejoró el cumplimiento de CPAP, pero no la educación basada en web interactiva. |
|-------------------------|----------------|-------------------------------------------------------------------------------------------------------------------------------------------------------|

**Tabla A.2:** CPAP. Requerimientos que deben de tener los equipos. Se dividen en los mínimos “must have”, más avanzados “should have” ya muy avanzados “nice to have”.

| CARACTERÍSTICAS BÁSICAS “MUST HAVE”                                         | VALOR RECOMENDADO/DEFINICIÓN                                                |
|-----------------------------------------------------------------------------|-----------------------------------------------------------------------------|
| Nivel de ruido (dBA; ISO 17510:1-2002)                                      | <30                                                                         |
| Presión Máxima (cm H <sub>2</sub> O)                                        | 20                                                                          |
| Compensación automática de fugas                                            | Mecanismo que garantiza el flujo necesario compensando las fugas            |
| Parámetros básicos registrados y descargables (tarjeta o del propio equipo) | AHI, fugas, horas de uso eventos residuales (180 días)                      |
| Rampa                                                                       | 45 minutos                                                                  |
| Humidificador integrado                                                     | Si es necesario utilizar humidificador este debe ir integrado con el equipo |
| Capacidad mínima del humidificador (ml)                                     | 250 (Capacidad mínima para que quepa agua para toda la noche)               |
| Peso (Kg)                                                                   | <3 Kg                                                                       |
| CARACTERÍSTICAS BÁSICAS “SHOULD HAVE”                                       | VALOR RECOMENDADO/DEFINICIÓN                                                |
| Suministro Eléctrico autónomo                                               | Necesidad frecuente                                                         |
| Algoritmos automáticos de ajuste de presión                                 | Auto-CPAP                                                                   |
| CARACTERÍSTICAS BÁSICAS “NICE TO HAVE”                                      | VALOR RECOMENDADO/DEFINICIÓN                                                |
| Puerto de oximetría)                                                        |                                                                             |
| Control remoto                                                              | Posibilidad de cambio de ajustes                                            |

**Tabla A.3:** Ventilación mecánica. Requerimientos que deben de tener los equipos. Se dividen en los mínimos “must have”, más avanzados “should have” ya muy avanzados “nice to have”.

| <b>MUST HAVE</b>                                                                    | <b>VALOR RECOMENDADO/DEFINICIÓN</b>                                                                                                                                                                                                                                 |
|-------------------------------------------------------------------------------------|---------------------------------------------------------------------------------------------------------------------------------------------------------------------------------------------------------------------------------------------------------------------|
| Nivel de ruido (dBA; ISO 17510:1-2002)                                              | <30                                                                                                                                                                                                                                                                 |
| Presión Máxima (cm H <sub>2</sub> O)                                                | Variable según fabricante (pueden alcanzar 40-50 cm de H <sub>2</sub> O)                                                                                                                                                                                            |
| Compensación de fugas                                                               | Mecanismo de monitorización dinámica del flujo que garantice el aumento del flujo necesario compensando las fugas                                                                                                                                                   |
| Parámetros básicos registrados y descargables (tarjeta o del propio equipo)         | Horas de uso, fugas totales o no intencionales, Volumen corriente, ventilación minuta, FR, T inspiratorio, relación I: E, IAH residual. Datos de todo el período uso/paciente acumulado.                                                                            |
| Rampa                                                                               | 20 minutos (máximo. 45 minutos)                                                                                                                                                                                                                                     |
| Humidificador                                                                       | Activo integrado en el ventilador                                                                                                                                                                                                                                   |
| Capacidad mínima del humidificador (ml)                                             | 250 (Capacidad mínima para garantice la humidificación toda la noche)                                                                                                                                                                                               |
| Peso (Kg)                                                                           | <3 Kg                                                                                                                                                                                                                                                               |
| <b>CARACTERÍSTICAS “SHOULD HAVE</b>                                                 | <b>VALOR RECOMENDADO/DEFINICIÓN</b>                                                                                                                                                                                                                                 |
| Plataformas con alarmas de eventos notables (Uso, fugas graves, eventos residuales) | Mejora control                                                                                                                                                                                                                                                      |
| Ajuste remoto de parámetros.                                                        | Posible en pacientes NO dependientes de VM (VNI <12h o nocturna), pendiente de autorizar en pacientes dependientes de VM (24h).<br><br>Posible sólo para algunos parámetros y según el modelo de ventilador (IPAP, EPAP y FR, no modificables el resto de settings) |
| <b>CARACTERÍSTICAS “NICE TO HAVE”</b>                                               | <b>VALOR RECOMENDADO/DEFINICIÓN</b>                                                                                                                                                                                                                                 |

|                                                        |                                                                                                                                                   |
|--------------------------------------------------------|---------------------------------------------------------------------------------------------------------------------------------------------------|
| Puerto de Oximetría                                    | Controles puntuales o frente a problemas                                                                                                          |
| Transmisión de datos en tiempo real                    | Control en casos concretos con visualización de curvas de las principales variables (Flujo, presión, fugas, ventilación minuta, FR, IAH residual) |
| Integración PTcCO <sub>2</sub>                         | Óptimo                                                                                                                                            |
| Optimizar entrega de flujos                            | Mejor tolerancia                                                                                                                                  |
| Posibilidad de conectar bandas torácicas y abdominales | Detección y control de asincronías.<br>Registro continuo señales (similar a la poligrafía respiratoria)                                           |

**Tabla A.4.** Ventilación mecánica. Estudios clínicos. Diferentes estrategias para el seguimiento de los pacientes.

| <b>EVIDENCIA EN TELEMONITORIZACIÓN DE LA VNI EN LA PRÁCTICA CLÍNICA</b>        |                                                                                                                  |                                                                 |
|--------------------------------------------------------------------------------|------------------------------------------------------------------------------------------------------------------|-----------------------------------------------------------------|
| <b>Primer autor, ref., (año)</b>                                               | <b>Intervención</b>                                                                                              | <b>Resultados</b>                                               |
| <b>¿Es posible la optimización de los parámetros ventilatorios iniciales?</b>  |                                                                                                                  |                                                                 |
| Patout (78)<br>(Thorax 2019)                                                   | Randomizado, optimización mediante oximetría/capnografía en domicilio vs PSG                                     | No diferencias en PaCO <sub>2</sub> diurna ni adherencia        |
| Hazenberg (64)<br>(Respir Med 2014)                                            | Randomizado, VNI ajustada en domicilio (datos software / oximetría/capnografía/ /soporte telefónico) vs hospital | No diferencias en efectividad y más coste-efectivo en domicilio |
| <b>¿Son útiles los datos en el seguimiento a largo plazo?</b>                  |                                                                                                                  |                                                                 |
| Rabec (79)<br>(Eur Respir J 2009)                                              | Datos software + oximetría                                                                                       | Reducción de los eventos residuales                             |
| Mansell (80)<br>(BMJ Open Respir Res 2018)                                     | Datos software (fugas)                                                                                           | Optimización de ventilación y aumento de adherencia             |
| Pasquina (81)<br>(Respiration 2012)                                            | Datos software (patrón de uso)                                                                                   | El uso intermitente de la VNI reflejaría mala tolerancia        |
| <b>¿Son útiles para detectar cambios en la situación clínica del paciente?</b> |                                                                                                                  |                                                                 |
| Borel (82)<br>(Respirology 2014)                                               | Datos software (aumento uso)                                                                                     | Marcador de gravedad del paciente                               |
| Borel (83)<br>(Thorax 2015)                                                    | Datos software (aumento FR y del número de ciclos controlados)                                                   | Predictor del inicio de una agudización de EPOC                 |
| Blouet (84)<br>(Int J COPD 2018)                                               | Datos software (aumento FR)                                                                                      | Predictor de hospitalización por agudización de la EPOC         |
| Palot (85)<br>(Sleep Med 2017)                                                 | Datos software (IAH)                                                                                             | Insuficiencia cardiaca.<br>Predictor de descompensación         |
